1 When should bees be flower constant? An agent-based model  
2 highlights the importance of social information and foraging  
3 conditions

4

5 Lucy Hayes & Christoph Grüter

6 School of Biological Sciences, University of Bristol, 24 Tyndall Avenue, BS8 1TQ Bristol,

7 UK

8 Correspondence: [c.grueter@bristol.ac.uk](mailto:c.grueter@bristol.ac.uk)

9

10 **Abstract**

11 1. Many bee species show flower constancy, *i.e.* a tendency to visit flowers of one type  
12 during a foraging trip. Flower constancy is important for plant reproduction, but whether  
13 bees also benefit from flower constancy remains unclear. Social bees, which often use  
14 communication about food sources, show particularly strong flower constancy.

15 2. We hypothesised that the sharing of social information increases the benefits of flower  
16 constancy because foragers share information selectively about high-quality food  
17 sources, thereby reducing the need to sample alternatives. We also asked if foraging  
18 landscapes affect flower constancy. We developed an agent-based model that allowed  
19 us to simulate bee colonies with and without communication and flower constancy in  
20 different foraging environments.

21 3. Flower constancy alone performed poorly in all environments, while indiscriminate  
22 flower choice was often the most successful strategy. However, communication  
23 improved the performance of flower constant colonies in nearly all tested environments.  
24 This combination was particularly successful when high-quality food sources were  
25 abundant and competition was weak.

26 4. Our findings help explain why social bees tend to be more flower constant than solitary  
27 bees and suggest that flower constancy can be an adaptive strategy in social bees.  
28 Simulations suggest that anthropogenic changes of foraging landscapes will have  
29 different effects on the foraging performance of bees that vary in flower constancy.

30

## 31 **Introduction**

32 Most flowering plant species are animal pollinated and bees, in particular, are important  
33 pollinators of wild and agricultural plants (Bawa, 1990; Klein et al., 2007; Ollerton et al., 2011).  
34 Several biological features explain why bees are helpful agents of reproduction for plants,  
35 including their abundance and their often broad (*i.e.* polylectic) diet in combination with a  
36 tendency to specialise on a particular flower type during an individual foraging bout. The latter  
37 behaviour, called flower constancy (Bateman, 1951; Chittka et al., 1999; Darwin, 1876; Grüter  
38 & Ratnieks, 2011; Waser, 1986), reduces conspecific pollen loss and heterospecific pollen  
39 deposition, both of which can reduce plant fitness (Ashman & Arceo-Gómez, 2013; Campbell  
40 & Motten, 1985; Chittka et al., 1999; Morales & Traveset, 2008; Waser, 1986). Flower  
41 constancy is also thought to enhance the coexistence of different plant species and, thus, shapes  
42 plant community structure (Morales & Traveset, 2008; Song & Feldman, 2014).

43 From a pollinator perspective, however, the benefits of flower constancy are less  
44 obvious. Ignoring potentially superior flower species appears to contradict optimal foraging  
45 theory (King & Marshall, 2022; Latty & Trueblood, 2020; Waser, 1986; Wells & Wells, 1983,  
46 1986). Why then are pollinators flower constant? The most widely accepted view is that flower  
47 constancy is driven by cognitive limitations, which can include (*i*) slow learning to forage  
48 efficiently on a new flower species, (*ii*) an inability to memorise more than one or a few flower  
49 types, (*iii*) unstable short-term memories which are prone to being erased by competing  
50 information or (*iv*) an inability to retrieve long-term memory about different flower species fast  
51 enough to be an efficient generalist (Darwin, 1876; Heinrich, 1979; Lewis, 1986; Menzel, 1999;

52 Raine & Chittka, 2007; Waser, 1986; for reviews see Chittka et al., 1999; Grüter & Ratnieks,  
53 2011). These cognitive limitations are likely to cause time delays as a bee tries to extract nectar  
54 from a flower after switching from a different species and they may increase switching times  
55 (Chittka et al., 1999; Goulson et al., 1997; Lewis, 1986; Raine & Chittka, 2007).

56 The “cognitive limitations hypothesis” as an explanation for flower constancy is not  
57 without challenges. Given that efficient foraging is likely to be under strong natural selection  
58 due to its effects on reproductive success (Heinrich, 1979), why does natural selection not lead  
59 to the evolution of lower flower constancy in all bees? How can we explain the finding that  
60 individual bees often show plasticity in their flower constancy, e.g. by being more flower  
61 constant after finding good rewards (Chittka et al., 1997; Grüter et al., 2011; Wells & Rathore,  
62 1994; but see Hill et al., 1997) or the distances between food sources are shorter (Gegeer &  
63 Thomson, 2004; Kunin, 1993; Mardern & Waddington, 1981)? Why do bee species vary in  
64 their degree of flower constancy? Social bees, in particular, are often highly flower constant  
65 (Cholis et al., 2020; Free, 1963; Heinrich, 1976, 1979; Hill et al., 1997; Kozuharova, 2018;  
66 Pangestika et al., 2017; Rossi et al., 2015; Slaa et al., 2003; White et al., 2001; but see Martínez-  
67 Bauer et al., 2021), while flower constancy seems to be less pronounced in solitary bees  
68 (Bateman, 1951; Campbell & Motten, 1985; Eckhardt et al., 2014; Jakobsson et al., 2008; Pohl  
69 et al., 2011; Smith et al., 2019; Waser, 1986; Williams & Tepedino, 2003). Smith et al. (2019),  
70 for example, studied pollen composition of 56 bee species and found that individual social bees  
71 showed a higher degree of specialisation during a foraging bout than solitary species. Different  
72 ecological needs could explain this difference. Solitary bees need to collect all required  
73 nutrients by themselves, potentially favouring a strategy of mixing resources during a foraging  
74 trip even if this has energetic costs (e.g. Eckhardt et al., 2014; Williams & Tepedino, 2003). In  
75 social species, on the other hand, different bees from the same colony can specialise on different  
76 types of resources and flower species to cover their nutritional needs.

77 Foragers of many social bees share information about profitable food sources, and this  
78 could affect the value of flower constancy. Honeybees use the waggle dance to indicate the  
79 odour (type) and location of profitable food sources (von Frisch, 1967) and some stingless bees  
80 lay pheromone trails (Grüter, 2020; Jarau, 2009; Lindauer & Kerr, 1960; Nieh, 2004). Stingless  
81 bees and bumblebees inform nestmates about the availability and odour of a good food source  
82 by means of excitatory or jostling runs inside their nest (Dornhaus & Chittka, 2004; Hrnčir,  
83 2009). Trophallaxis – food transfer between bees – is performed by honey bees and stingless  
84 bees (Farina et al., 2012; Farina & Grüter, 2009; Hart & Ratnieks, 2002; Hrnčir et al., 2006;  
85 Krausa et al., 2017; von Frisch, 1967) and is another behaviour that allows nestmates to learn  
86 the odour of available food sources (Aguilar et al., 2005; Farina et al., 2005; Lindauer & Kerr,  
87 1960; von Frisch, 1967). These different communication behaviours share two common  
88 features. First, they depend on food quality. Dances, pheromone trails, jostling runs and  
89 trophallaxes occur at higher frequencies if the exploited food sources are of higher quality  
90 (Farina et al., 2012; Hrnčir, 2009; Krausa et al., 2017; Lindauer & Kerr, 1960; von Frisch,  
91 1967). Second, during these social interactions, nestmates can learn the odour of the exploited  
92 flower species and acquire a preference for this flower species in the field.

93 Heinrich (1976) was probably the first to propose a link between recruitment  
94 communication and flower constancy. Since recruiting bees share information selectively about  
95 high-quality food sources, recruits can discover profitable flower types without the costs of  
96 sampling different, lower-quality plant species. This does not require that foragers are able to  
97 direct nestmates to a specific location, as in honeybees and some stingless bees, but depends  
98 more generally on foragers biasing the food search towards flower types that are more  
99 profitable. Among the social bees, bumble bees seem to be less flower constant than honey bees  
100 (Bateman, 1951; Grant, 1950; Martínez-Bauer et al., 2021; Smith et al., 2019), possibly because  
101 their communication system is less sophisticated than that of honey bees (Heinrich, 1976).

102 Experimental studies of the benefits of flower constancy and how they depend on social  
103 and ecological traits are logistically challenging for several reasons. For example, it is often not  
104 possible to manipulate the degree of flower constancy while keeping other factors constant.  
105 Agent-based simulation models can be a useful complementary tool to evaluate how biological  
106 and ecological factors affect the benefits of a behavioural strategy. We developed an agent-  
107 based simulation model to test the hypothesis that flower constancy is more beneficial in bees  
108 that communicate about profitable food sources than in bees without communication. Colonies  
109 consisting of virtual bees (agents) were either flower constant or they chose food sources  
110 randomly (indiscriminately) in environments that varied in the number and quality of food  
111 sources. Some studies have found that bees adjust the degree of flower constancy depending on  
112 the foraging conditions, being more flower constant if the rewards on offer are better (Chittka  
113 et al., 1997; Grüter et al., 2011; Wells & Rathore, 1994; but see Hill et al., 1997) and the  
114 distances between food sources (or density) are shorter (Gegear & Thomson, 2004; Kunin,  
115 1993; Marden & Waddington, 1981). We, therefore, expected flower constancy to be more  
116 beneficial in environments with more flowers and larger reward sizes. Exploitation competition,  
117 on the other hand, is expected to favour a indiscriminate choice because greater competition  
118 increases the costs of rejecting a reward (Pulliam, 1974).

119

## 120 **The model**

121 We built an agent-based model (ABM) using the programming software NetLogo 6.1  
122 (Wilensky, 1999) (see supplementary material for NetLogo file). It is an extension and further  
123 analysis of the model developed in Grüter & Hayes (in preparation), which analysed foraging  
124 distances. The model simulates an environment with a colony surrounded by food sources. The  
125 agents (“bees”) operate on a two-dimensional square grid with 400 x 400 patches. A single  
126 patch length corresponds to 5 meters and 1 tick corresponds to 1 second. Thus, the size of the  
127 virtual world corresponds to 2 x 2 km. The nest of the colony is positioned in the centre of the

128 grid ( $x=0, y=0$ ). In the default situation, environments contained two different flower types that  
129 differed in the rewards they offered.

130 The model allows simulating a wide range of parameter values, but for the purpose of  
131 this study we based our default parameters, such as the nest stay time ( $t_{\text{nest}}$ ), flight speed ( $v_{\text{flight}}$ ),  
132 metabolic costs of flying ( $M_{\text{cost}}$ ), and crop capacity ( $Crop$ ) on the Western honeybee *Apis*  
133 *mellifera* because we have accurate information about these relevant biological parameters in  
134 *Apis mellifera*. Other values were tested (see Table 1 and section *Sensitivity analysis and model*  
135 *exploration*).

136 Foragers in social bees use different behavioural mechanisms to transmit social  
137 information and, thereby, influence the food source preferences of their nestmates (see  
138 introduction). The model does not simulate a particular behaviour, but a generic process that  
139 biases the food preferences of nestmates, which could correspond to jostling runs, trophallaxis  
140 or the waggle dance.

141

142 *Entities and state variables*

143 Bees

144 The default colony size was 100 agents (forager bees), which corresponds to the size of the  
145 forager pool in many species of bumble bees (Westphal et al., 2006) and stingless bees (Grüter,  
146 2020). Agents could assume any of the following states: (1) *generalists*, (2) *feeding forager*,  
147 (3) *searching forager*, (4) *returning forager*, (5) *inside-nest-worker* and (6) *influencer* (see Fig.  
148 1).

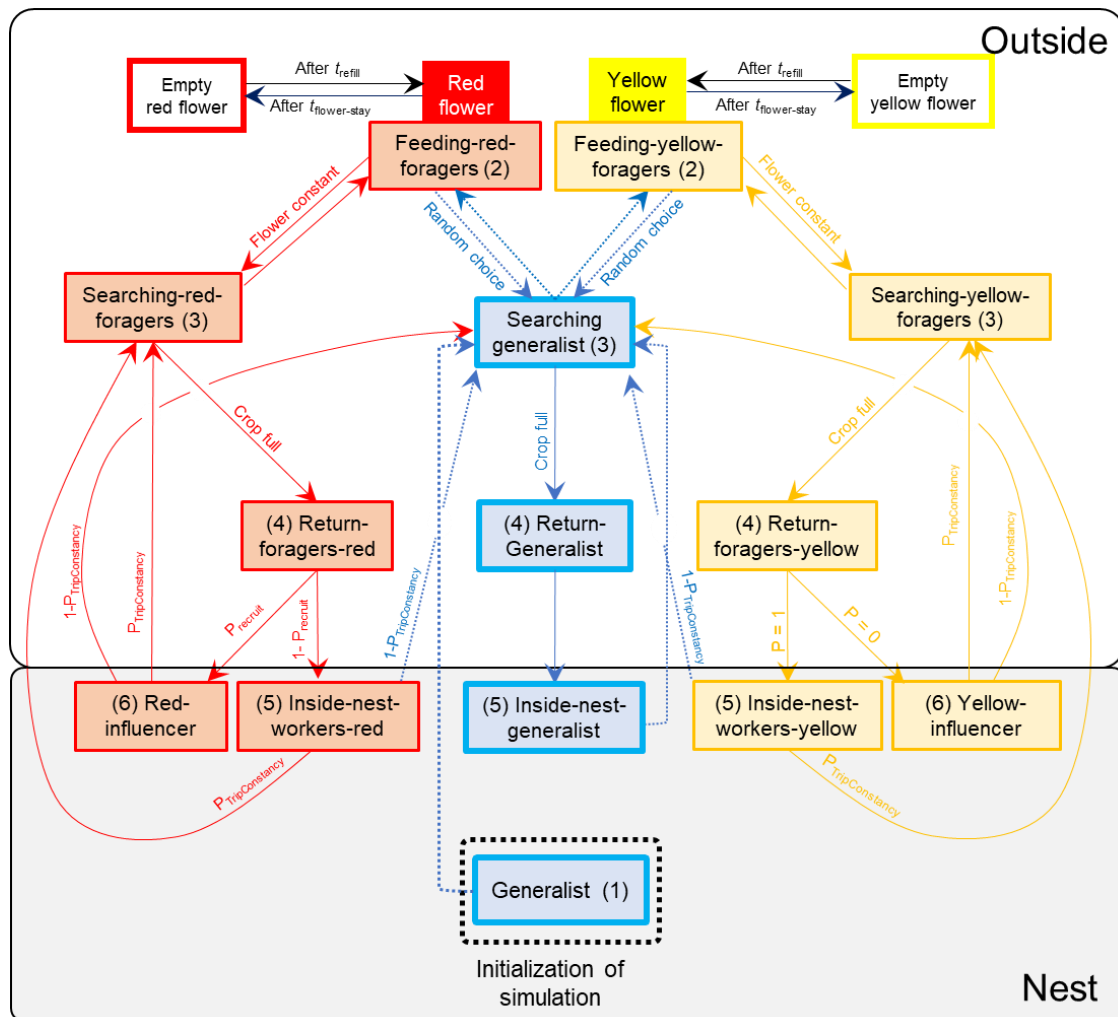

149

150 **Fig. 1.** State diagram showing the different states of the agents and the possible transitions between  
 151 states. Here, yellow flowers were arbitrarily chosen to represent a lower-quality food source, therefore,  
 152 the default probability that foragers visiting yellow flowers would become influencers after their return to  
 153 the nest was 0.

154

155 Agents begin the simulation in the centre of the nest with energy = 0 as *generalists*.

156 They then move at a flying speed of 1.4 patch/tick ( $v_{\text{flight}}$ ), corresponding to a flight speed of

157 *Apis mellifera* (7 m/sec, von Frisch 1967). Their random search behaviour follows a Lévy-flight

158 pattern (with  $\mu = 2.4$  as default) (Reynolds, 2009; Reynolds et al., 2007). A Lévy-flight consists

159 of a random sequence of flight segments whose lengths,  $l$ , come from a probability distribution

160 function having a power-law tail,  $P(l) \sim l^{-\mu}$ , with  $1 < \mu < 3$  (Reynolds et al., 2007). The speed of

161 agents moving inside the nest ( $v_{\text{nest}}$ ) was arbitrarily chosen to be 0.1 (patch/tick). Flying has a

162 metabolic cost ( $M_{\text{cost}}$ ) of 0.032 Joule (J) per tick in the default condition (Heinrich, 1975;  
163 Willmer, 2011). Once an agent encounters a food source, they remain on the food source for 60  
164 ticks ( $t_{\text{flower-stay}}$ ) under default conditions (*feeding foragers*), irrespective of whether they were  
165 choosing indiscriminately or are flower constant. Thus, we assume that the time spent handling  
166 a flower or flowers in a patch and extracting the reward is the same for flower constant and  
167 indiscriminate foragers. This was chosen as the default condition to explore whether flower  
168 constancy can be an adaptive strategy in the absence of cognitive constraints.

169 The agent then continues to forage (*searching foragers*) until its crop is full, after which  
170 it returns to the nest (*returning foragers*) to unload its energy and stay in the nest for 300 ticks  
171 ( $t_{\text{nest-stay}}$ ) (Farina, 2000; Seeley, 1986; von Frisch, 1967). In the default condition, only foragers  
172 visiting the high-quality food source could become *influencers* (i.e. bees that bias the food  
173 choice of other bees) upon return to the nest. *Influencers* target *inside-nest-workers* that are not  
174 yet flower-constant to the high-quality food type by changing the latter's preference if they  
175 encountered each other on same patch inside the nest. Following such an encounter, *inside-*  
176 *nest-workers* become flower constancy for the high-quality type.

177 Since recruitment behaviours often depend on the food source distance (with greater  
178 foraging distances lowering the probability of recruitment), we simulated recruitment curves  
179 where the probability of becoming an *influencer* decreased with increasing distance of the last  
180 visited food patch (Fig. S1).

181

## 182 *Food sources*

183 In the default condition, two different types of food sources can be found in the environment,  
184 mimicking the typical situation in experimental flower constancy studies (e.g. Chittka et al.,  
185 1997; Goulson & Wright, 1998; Grüter et al., 2011; Ishii & Masuda, 2014; Wells & Wells,  
186 1983). The food source types differ in the rewards they offer per visit. Natural bee-visited  
187 flowers offer between 0.1 and 10  $\mu\text{L}$  of nectar per flower (Willmer, 2011, p. 203). For the



188 default condition, we chose 5 $\mu$ L (29.07 J) for the high-quality type and 2.5 $\mu$ L (14.535 J) for the  
189 low-quality type. This reward could represent an individual flower that offers a large reward or  
190 a small patch of several flowers, each offering smaller quantities, or it could represent a larger  
191 patch of flowers that is shared by several bees.

192 We tested different refill times ( $t_{\text{refill}}$ ) for food sources: 0, 1200 and 3600 ticks (Stout &  
193 Goulson, 2002). When  $t_{\text{refill}} = 0$ , food sources became rewarding again immediately after the  
194 visit of a bee. This simulates conditions under which bees have a high probability of finding a  
195 reward after landing on food source, which might occasionally occur at food patches. With  
196  $t_{\text{refill}} = 3600$ , a food source (flower or patch) was empty for the equivalent of an hour after it had  
197 been visited by a bee, leading to intense exploitation competition among bees. The number of  
198 food sources per type in the simulated environment varied between 1500 (low abundance) and  
199 4500 (high abundance). Default conditions simulated even numbers of food sources for both  
200 food source types, but we also explored uneven food source abundances (Table 1). We  
201 measured the average foraging distance of bees during a simulation run to confirm that the  
202 simulated conditions led to naturally realistic average foraging distances for many social bees  
203 ( $271 \pm 130$  m; range 63-581 m; N = 1800 simulations in default conditions) (Kohl et al., 2020;  
204 Van Nieuwstadt & Iraheta, 1996; Walther-Hellwig & Frankl, 2000).

205 The energy collected by agents with a full crop was estimated in the following way:  
206 *Apis mellifera* can carry up to  $\sim 70$   $\mu$ L of nectar in their crop, but they usually carry less (I'Anson  
207 Price et al., 2019; Núñez, 1966). The crop load has been shown to depend on the quality of the  
208 visited food source, with lower quality food sources leading to smaller crop loads (Núñez, 1966,  
209 1970). Agents visiting the low-quality flower type foraged until their crop contained 25 $\mu$ L,  
210 whereas agents visiting the high-quality food type collected 50 $\mu$ L per foraging trip. Generalist  
211 bees that choose indiscriminately have an intermediate crop load, reflecting the relative number  
212 of high- and low-quality food sources in the environment. For example, in an environment with  
213 an even number of high- and low-quality food sources, they collect 37.5 $\mu$ L per foraging trip.

214 Sugar concentration of collected nectar varies considerably from c. 10-70% (I'Anson Price,  
215 2018; Seeley, 1986; Willmer, 2011). We chose an average sugar concentration of 35%,  
216 providing 5.814 J/ $\mu$ L.

217 Each simulation lasted 36,000 ticks (i.e. 10 hours), simulating a day with good foraging  
218 conditions. We measured the total energy collected by a colony during this period divided by  
219 the number of agents (Energy/bee). Our main questions were if the energy/bee depended on  
220 flower constancy (vs. indiscriminate choice), communication (vs. no communication), refill  
221 time, the number of food sources and reward size. We also tested situations when flower  
222 constancy was lower after visiting a low-quality food source ( $Constancy_{LQ}$ ) (Grüter et al.,  
223 2011), when there were 4 food source types and when indiscriminate flower choice increased  
224 the time to extract a reward from a food source (i.e. to simulate cognitive constraints) (Chittka  
225 et al., 1999).

226

### 227 *Sensitivity analysis and model exploration*

228 We varied a range of other factors to explore how they affected our results. These included  
229 colony size, crop load size, flower stay time, metabolic costs, nest stay time, Lévy flight  $\mu$ ,  
230 selectivity of communication (i.e. bees foraging on low-quality food source become *influencers*  
231 with the same probability as those foraging on the high-quality type) and the shape of the  
232 recruitment curve (see Fig. S1).

233 We performed 30 runs per parameter combination. We do not provide  $p$ -values due to  
234 the arbitrariness of the simulation number but indicate 95%-confidence intervals to facilitate  
235 interpretation of effect sizes.

236

237 **Table 1:** Overview of the model variables and the used values.

| Variables | Description | Default values | Other values tested | Information source |
|-----------|-------------|----------------|---------------------|--------------------|
|-----------|-------------|----------------|---------------------|--------------------|

|                          |                                                                                                                      |                    |                                       |                                   |
|--------------------------|----------------------------------------------------------------------------------------------------------------------|--------------------|---------------------------------------|-----------------------------------|
| Colony size              | Number of foragers in a colony                                                                                       | 100                | 5-300                                 | Westphal et al. 2006; Grüter 2020 |
| $FS_{\text{number}}$     | Number of food sources per type                                                                                      | 3000               | 1500, 4500                            | arbitrary                         |
| $FS_{\text{size}}$       | Size of food sources                                                                                                 | 1 patch            |                                       | arbitrary                         |
| $FS_{\text{types}}$      | Number of food source types                                                                                          | 2                  | 4                                     | arbitrary                         |
| $Reward_{\text{HQ}}$     | Nectar amount per food source                                                                                        | 5 $\mu\text{l}$    | 2.5 $\mu\text{l}$ , 10 $\mu\text{l}$  | Willmer 2011                      |
| $Reward_{\text{LQ}}$     | Nectar amount per food source                                                                                        | 2.5 $\mu\text{l}$  | 1.25 $\mu\text{l}$ , 5 $\mu\text{l}$  | Willmer 2011                      |
| $v_{\text{flight}}$      | Flight speed                                                                                                         | 1.4 patch/tick     |                                       | von Frisch 1967                   |
| $M_{\text{cost}}$        | Metabolic costs of flight, J/tick                                                                                    | 0.032              | 0.016, 0.064                          | Heinrich 1975; Willmer 2011       |
| $t_{\text{flower-stay}}$ | Time spent at food source                                                                                            | 60 ticks           | 20, 180                               | arbitrary                         |
| $v_{\text{nest}}$        | Movement speed inside nest                                                                                           | 0.1 patch/tick     |                                       | arbitrary                         |
| $t_{\text{nest-stay}}$   | Time in nest between trips                                                                                           | 300 ticks          | 150, 450                              | Farina 2000                       |
| $Crop_{\text{HQ}}$       | Crop load when flower constant to HQ food sources                                                                    | 50 $\mu\text{l}$   | 25 $\mu\text{l}$ , 100 $\mu\text{l}$  | Núñez 1966                        |
| $Crop_{\text{LQ}}$       | Crop load when flower constant to LQ food sources                                                                    | 25 $\mu\text{l}$   | 12.5 $\mu\text{l}$ , 50 $\mu\text{l}$ | Núñez 1966                        |
| $Crop_{\text{Random}}$   | Crop load without flower constancy                                                                                   | 37.5 $\mu\text{l}$ | 50 $\mu\text{l}$                      | Núñez 1966                        |
| $t_{\text{refill}}$      | Time until food sources offer food again                                                                             | 0 ticks            | 1200, 3600                            | Stout & Goulson, 2002             |
| Lévy $\mu$               | Lévy flight parameter                                                                                                | 2.4                | 1.8, 3.0                              | Reynolds et al. 2009              |
| $Constancy_{\text{HQ}}$  | Probability to remain constant to a type after leaving a high-quality food source during flower constant simulations | 100%               |                                       | Grüter et al. 2011                |
| $Constancy_{\text{LQ}}$  | Probability to remain constant to a type after leaving a low-quality food source during flower constant simulations  | 100%               | 90%, 95%                              | Grüter et al. 2011                |

238

239

## 240 **Results**

### 241 *Food source abundance and refill speed*

242 We found that communication about the high-quality flower type did not affect the collected  
 243 energy if bees chose food sources indiscriminately (Fig. 2). However, if colonies were flower  
 244 constant, communication increased the energy collected by bees in all situations when the two  
 245 flower types were equally abundant (Fig. 2, see also Figs. 4-8), showing an interaction between

246 flower constancy and communication. The combination of communication and flower  
 247 constancy was relatively more beneficial when high-quality food sources were easy to find,  
 248 either because they were highly abundant (Fig. 2c,f,i) or because visited food sources  
 249 replenished quickly (Fig. 2a,b,c).  
 250

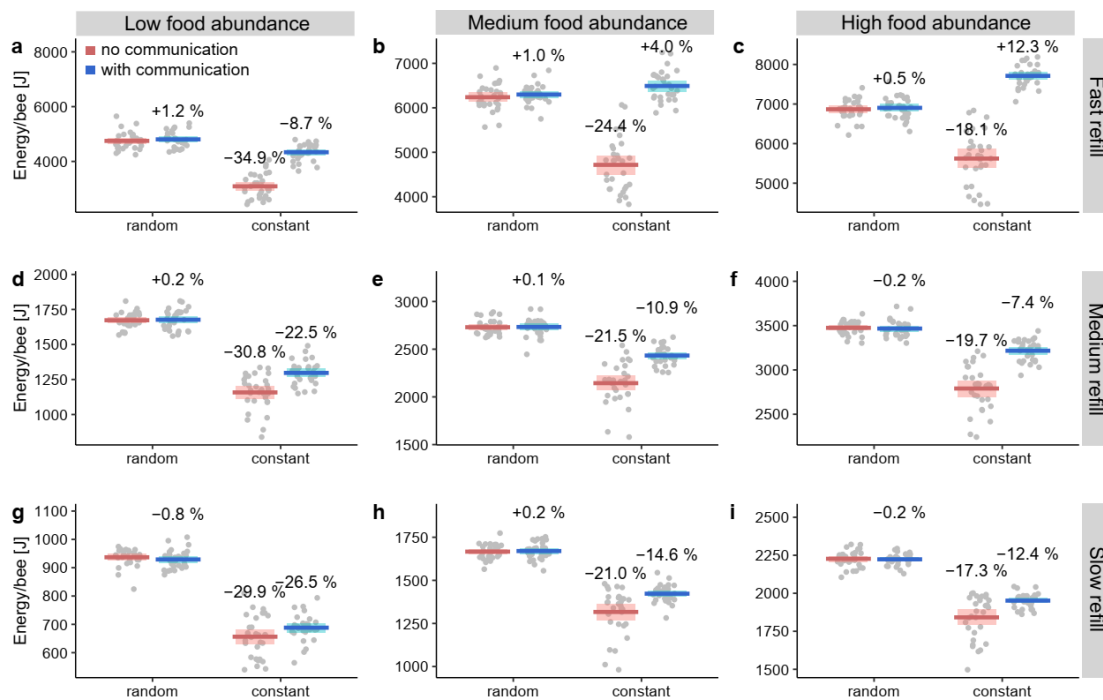

251  
 252 **Fig. 2.** Energy collected per bee (Joule) under varying food abundances (1500, 3000 and 4500 food  
 253 sources per type) and refill times (0, 1200 and 3600 ticks). Colonies either showed flower constancy  
 254 (constant) or they chose food source indiscriminately (random). Plots show the mean and the 95%-  
 255 confidence based on 30 simulations (grey dots). Numbers show % of change compared to random  
 256 choice without communication.

257  
 258 In the most favourable conditions, flower constancy in combination with communication was  
 259 the most successful combination (Fig. 2b, c). In all other conditions, indiscriminate choice was  
 260 the most successful strategy.

261 The relative abundance of the two food source types also played an important role.  
 262 Flower constancy combined with communication was relatively more successful when high-  
 263 quality food sources were more common than the low-quality flower type compared to when  
 264 they were rarer than the lower-quality flower type (Fig. 3). When high-quality food sources

265 represented the common flower type, colonies with flower constancy and communication were  
266 either more successful (Fig. 3b) or not much less successful than colonies with indiscriminate  
267 choice (Fig. 3d).

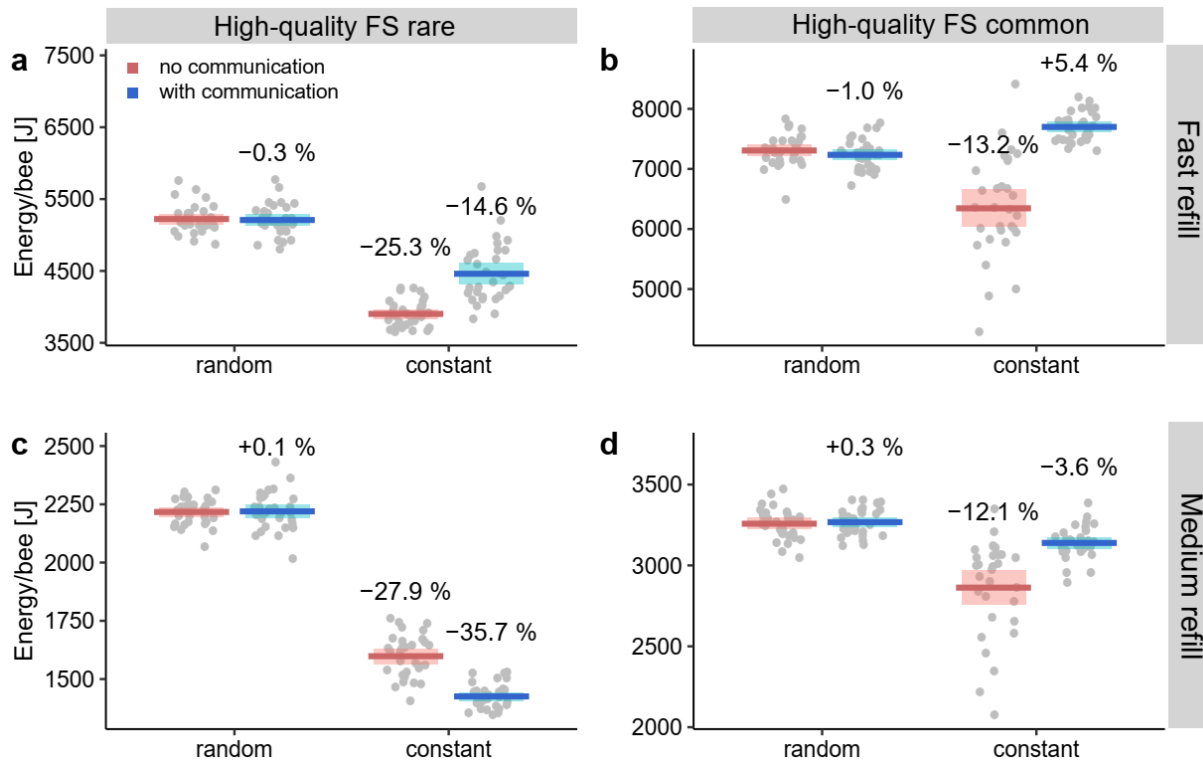

268

269 **Fig. 3.** Energy collected per bee (Joule) when high-quality food sources were either rare (1500) or  
270 common (4500) compared to the low-quality food sources (3000). Default values were used for the  
271 other parameters (Table 1).

272

273 However, indiscriminate choice was considerably more successful when high-quality food  
274 sources were in the minority (Fig. 3a,c). When high-quality food sources were particularly  
275 difficult to find, communication lowered the foraging success of flower constant colonies (Fig.  
276 3c). Under these circumstances, communication directs the foragers of a colony towards a rare  
277 food source, leading to long search times.

278

### 279 *Reward sizes*

280 Reward quantities are known to affect flower constancy, with bees becoming more flower  
281 constant with increasing reward quantities (Chittka et al., 1997; Grüter et al., 2011; Wells &

282 Rathore, 1994). In accordance with this observation, we found that flower constancy became  
 283 relatively more successful (energy/bee) as reward sizes of both high- and low-quality food  
 284 sources increased (Fig. 4). However, indiscriminate choice was the most successful strategy in  
 285 many tested environments.

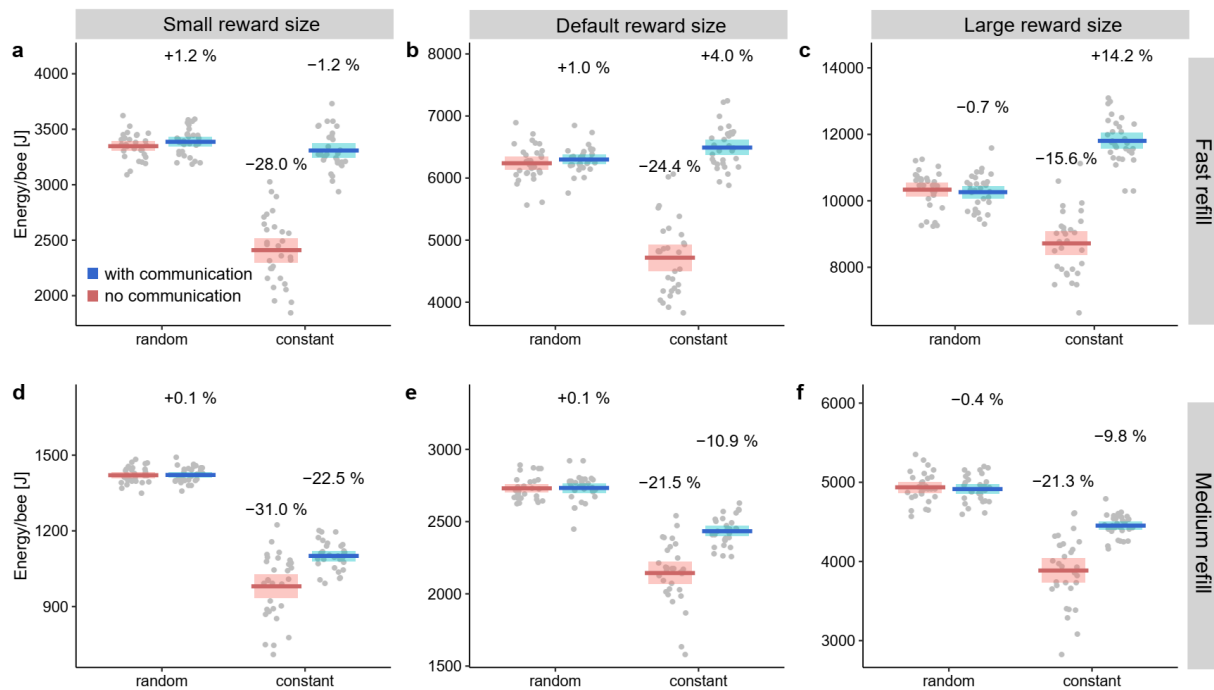

286  
 287 **Fig. 4.** Energy collected per bee (Joule) when rewards were (a) smaller (2.5 $\mu$ l and 1.25 $\mu$ l) or (c) larger  
 288 (10 $\mu$ l and 5 $\mu$ l) than in the (b) default situation (5 $\mu$ l and 2.5 $\mu$ l). Medium food source abundance was  
 289 simulated; default values were used for the other parameters (Table 1). Blue shows means and 95%-  
 290 CI for colonies using communication, red shows data for colonies choosing indiscriminately.

291  
 292 *Time needed to collect a reward*

293 The time bees need to extract a reward from a flower will affect the time costs of foraging  
 294 decisions and, if the refill time is >0, it will affect the number of depleted food sources in the  
 295 environment. Under default conditions, bees needed 60 ticks (1 minute) to obtain the reward  
 296 from a flower/food patch. We explored how different values for  $t_{\text{Flower-stay}}$  affected the benefits  
 297 of flower constancy and communication. Increasing the time needed to obtain a reward  
 298 increased the relative benefits of combined flower constancy and communication compared to  
 299 short reward collection times (Fig. 5).

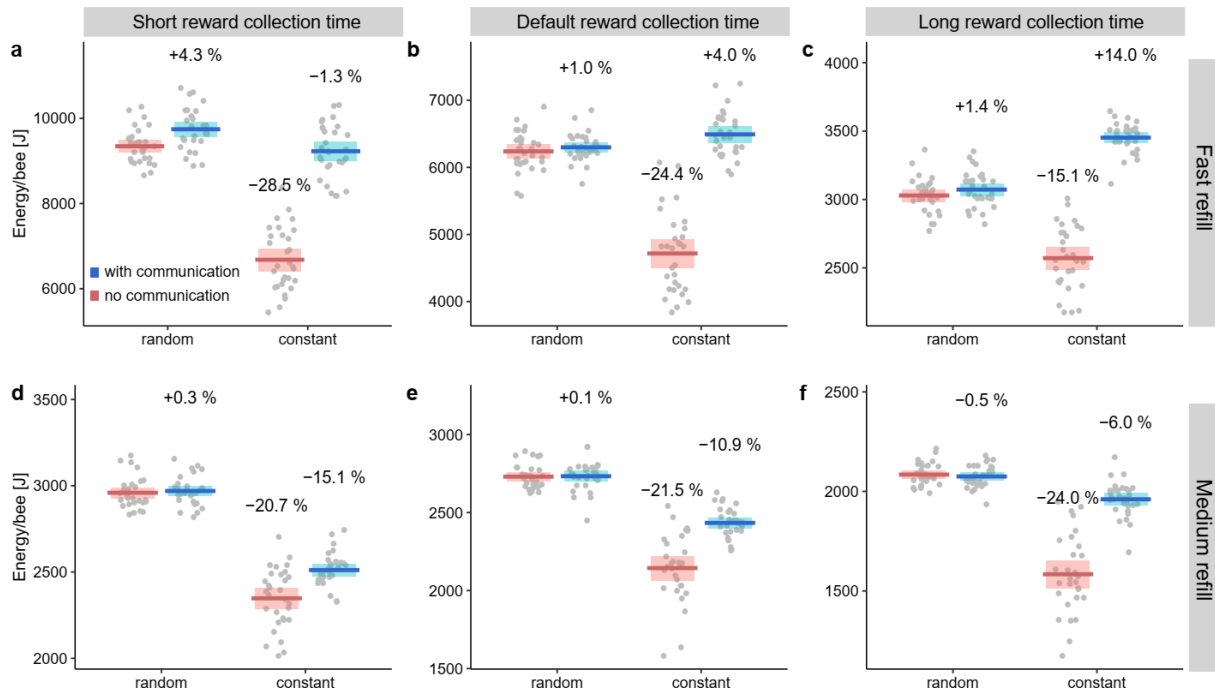

300

301 **Fig. 5.** Energy collected per bee (Joule) when the time required to obtain a reward from a food source  
302 was (a,d) shorter (20 ticks) or (c,f) longer (180 ticks) than in the (b,e) default situation (60 ticks).  
303 Default values and a medium food source abundance were simulated (Table 1).

304

### 305 *Quality dependent flower constancy*

306 Under default conditions, flower constancy did not depend on the quality of the food source  
307 (“spontaneous flower constancy”, Hill et al., 1997). We simulated situations when bees visiting  
308 a low-quality food source were slightly less flower constant (they had a 90% or a 95% chance  
309 to remain flower constant on the subsequent visit, as in Grüter et al., 2011). Our results show  
310 that this quality-dependent flower constancy considerably improves the energy collected by  
311 colonies following this strategy of quality-dependent flower constancy (Fig. 6).

312

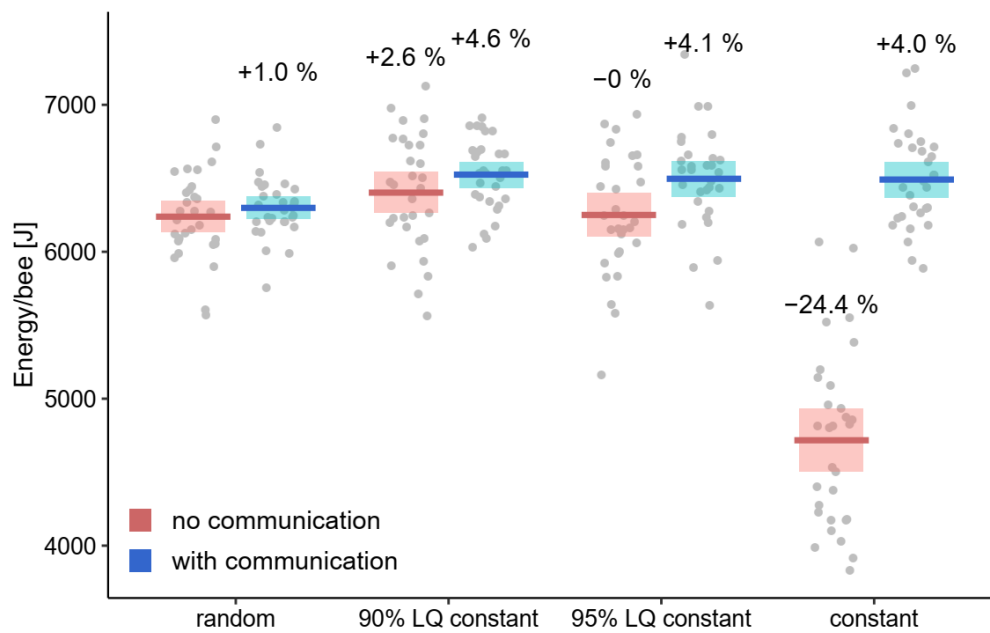

313

314 **Fig. 6.** Energy collected per bee (Joule) when bees foraged indiscriminately, when they showed  
315 reduced flower constancy after visiting a low-quality food source (90% LQ constant or 95% LQ  
316 constant) and when they were strictly flower constant. Refill time was 0, default values were used for  
317 the other parameters (Table 1).

318

### 319 *Exploring environments with 4 food types*

320 When environments provide four different types of food sources rather than two, flower  
321 constancy is less favourable overall (Fig. 7). In other words, indiscriminate flower choice is  
322 highly beneficial in an environment where flower constancy would limit the options a forager  
323 has to a small subset (25% of all food sources) of all available food sources than with two food  
324 source types (Fig. 7).

325 We tested situations where one, two or three of the four plant types were of high quality,  
326 while the remaining food sources were of low quality. While it was always beneficial to use  
327 communication when colonies were also flower constant, the relative benefits of  
328 communication diminished as the number of high-quality food types and the refilling time  
329 increased. Unsurprisingly, therefore, foraging in an environment that consists mainly of high-  
330 quality food sources belonging to different plant species somewhat diminishes the value of  
331 using communication to direct foragers towards higher-quality food sources.



332

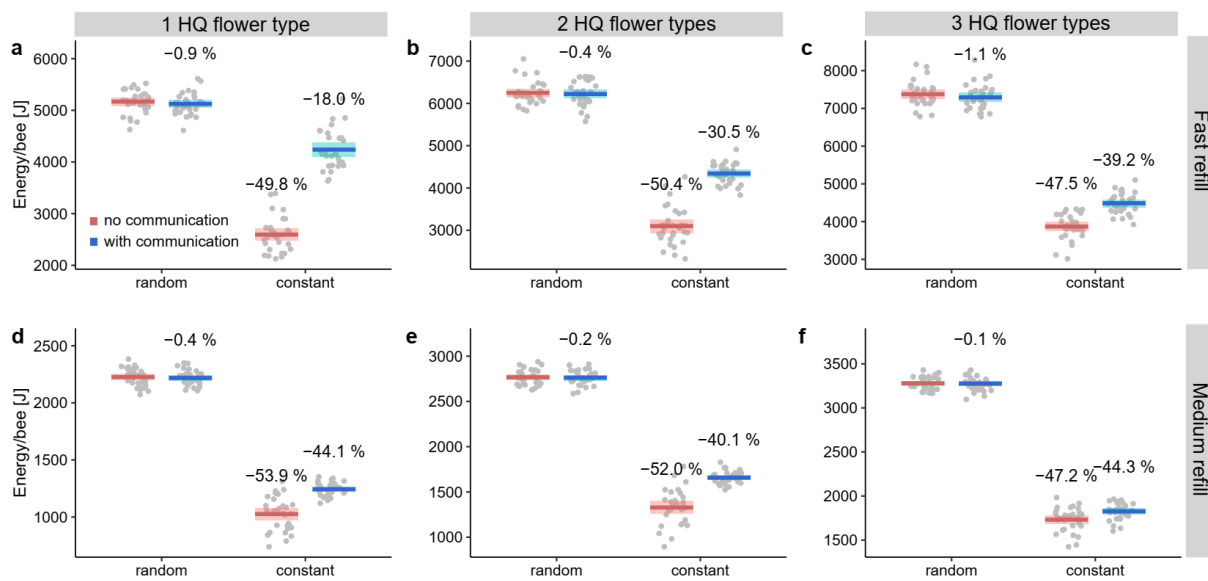

333

334 **Fig. 7.** Energy collected per bee (Joule) when bees foraged in an environment of four flower species. In  
335 (a) & (d), one of the four plant types was of high quality, while the remaining three types were of low  
336 quality. In (b) & (e), two of four types were of high quality and in (c) & (f), three of flower types were of  
337 high quality. Food sources were refilling either at a fast or a medium rate.

338

### 339 *Time penalty for non-specialists*

340 So far, we have assumed that there are no additional time costs (e.g. as a result of cognitive  
341 limitations) for bees that do not specialise on a particular type of food source. To explore the  
342 consequences of cognitive limitations, we simulated situations when indiscriminate bees  
343 require more time to extract a reward from a food source compared to flower constant bees. A  
344 time penalty for indiscriminate bees favours flower constant colonies, especially those that also  
345 communicate the high-quality flower type to nestmates (Fig. 8).

346

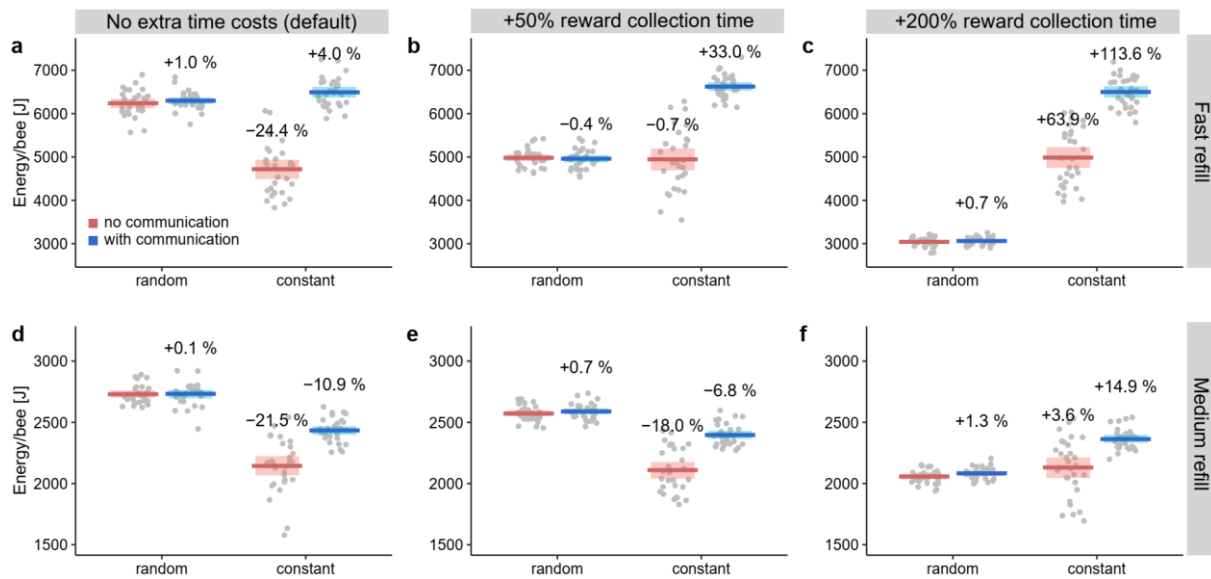

347

348 **Fig. 8.** Energy collected per bee (Joule) when non-specialists needed 50% (b, e) or 200% (c, f) more  
349 time than flower constant bees to obtain a reward from a food source. Food sources were refilling  
350 either at a fast ( $t_{\text{refill}}=0$ ) or a medium rate ( $t_{\text{refill}}=1200$ ). Default values were used for the other  
351 parameters (Table 1).

352

### 353 *Sensitivity analysis and model exploration*

354 Varying colony size from 5 to 300 (Fig. S2) does not greatly affect the general pattern observed  
355 for the default colony size of 100 (see Fig. 2). When food sources refill at a fast rate (Fig. S2a),  
356 bees do not experience exploitation competition and colony size does not affect the energy  
357 collected by individual bees. Increasing the refill time while also increasing the number of  
358 agents searching for food, on the other hand, increases exploitation competition and, therefore,  
359 lowers the energy collected by individual bees (Fig. S2b,c).

360 Using different recruitment curves (Fig. S1) had no noticeable effect on the energy  
361 collected by bees, but non-selective recruitment (recruitment to both high- and low-quality food  
362 sources) lowers the collected energy to levels similar to those of flower constant colonies  
363 without communication (Fig. S3). Changing the metabolic costs of flying or the Lévy-flight  $\mu$   
364 has little effect on the overall pattern (Fig. S4, S5), whereas increasing the time spent inside the  
365 nest in-between foraging trips reduces the energy collected by bees, but less so in colonies with

366 flower constancy (Fig. S6). Thus, longer nest stay times favour flower constancy. Flower  
367 constancy was also favoured when bees had smaller crop sizes (Fig. S7).

368

## 369 **Discussion**

370 Results from our simulations suggest that flower constancy without communication is less  
371 successful than indiscriminate choice under all tested conditions. Flower constancy imposes  
372 significant costs because it (*i*) limits the available options to a subset of all available flowers,  
373 thereby increasing time and energy costs during foraging, and (*ii*) causes many foragers to  
374 specialise on a sub-optimal flower type. Communication about the high-quality flower type  
375 positively interacted with flower constancy (Fig. 2) and considerably improved the foraging  
376 success of flower constant colonies by. Communication allows a colony to focus on high-  
377 quality flowers, thereby reducing the second type of cost (*ii*). Many species of social bees have  
378 evolved mechanisms of reward-quality dependent recruitment communication, which allow  
379 *influencers* to affect the foraging decisions of their nestmates towards a particular flower type,  
380 mainly via olfactory learning (Dornhaus & Chittka, 1999; Farina et al., 2012; Jarau & Hrncir,  
381 2009; Lindauer & Kerr, 1960; von Frisch, 1967). This, in turn, lowers the benefits of sampling  
382 alternative flower species and highlights the importance of social information use as a process  
383 of information-filtering (Grüter et al., 2010; Rendell et al., 2010). Our findings can help explain  
384 why social bees tend to be more flower constant than solitary bees (e.g. Smith et al., 2019;  
385 Waser, 1986).

386 The general foraging conditions had a strong effect on the value of flower constancy  
387 and the strength of its interaction with communication. Flower constancy in combination with  
388 communication was the most successful strategy when foraging conditions were very  
389 favourable, while indiscriminate choice was the better strategy when foraging options were  
390 more limited. For instance, flower constancy in combination with communication was  
391 beneficial when foragers did not encounter empty food sources (refill time of 0) and food

392 sources were abundant (Fig. 2b,c), when most food sources were of high-quality (Fig. 3b) and  
393 when rewards were large (Fig. 4c). These findings are consistent with empirical studies showing  
394 that bees are more flower constant when flower density is higher (Chittka et al., 1997; Kunin,  
395 1993; Marden & Waddington, 1981) and rewards are larger (Chittka et al., 1997; Greggers &  
396 Menzel, 1993; Grüter et al., 2011). Similarly, predator-prey models show that the abundance of  
397 a prey item has a positive effect on diet specialisation of the predator (Pulliam, 1974). If food  
398 sources took time to replenish, resulting in many empty food sources due to exploitation  
399 competition, indiscriminate choice was more successful (Fig. 2d-i), suggesting that rejecting  
400 flowers due to flower constancy is more costly in environments that offer fewer options.

401 Changes in the temporal dynamics of foraging trips affected the performance of the  
402 different strategy by changing the relative costs of ignoring flowers (*i*) and choosing suboptimal  
403 food sources (*ii*). Flower constancy in combination with communication performed relatively  
404 better if bees required more time to extract a reward from a food source (Fig. 5). One  
405 explanation for this is that visiting low-quality food sources, which is common with  
406 indiscriminate choice, becomes relatively more costly as the time costs of a flower visit  
407 increase. Thus, longer flower handling times, e.g. due to a complex flower morphology, favour  
408 flower constancy from both an adaptive and a constraints-based perspective (see Chittka et al.,  
409 1999 for arguments based on cognitive constraints). Flower constancy in combination with  
410 communication performed relatively better when bees stayed in their nest longer (Fig. S6) and  
411 had smaller crops (Fig. S7). These findings are somewhat puzzling, but one explanation could  
412 be that longer nest stay times provide *influencers* with more opportunities to communicate their  
413 findings to other bees. When food sources need time to replenish, longer nest stay times will  
414 reduce the number of depleted food sources a bee encounters, which favours flower constancy  
415 in combination with communication (Fig. 2b,c). Similarly, when bees have smaller crop loads,  
416 they visit fewer food sources per trip and spend a larger proportion of their time in the nest,  
417 reducing exploitation competition and the number of depleted food sources. Crop size will

418 depend on body size and one might, therefore, predict that smaller bees are more flower  
419 constant, which is consistent with comparative data (Smith et al. 2019). However, it is unlikely  
420 that there is straight forward relationship between crop size, body size and flower constancy in  
421 nature because body size covaries with numerous other extrinsic and intrinsic factors, including  
422 foraging conditions, metabolic costs, flying speed or sensory acuity (Gervais et al., 2020; Grab  
423 et al., 2019; Spaethe et al., 2007), all of which might affect flower constancy.

424         The Western honey bee *Apis mellifera* is strongly flower constant, but there is  
425 disagreement about whether and when flower constancy depends on the profitability of visited  
426 flowers. Some studies have suggested that flower constancy is often “spontaneous”, *i.e.*  
427 unrelated to reward size (Wells & Wells 1983; Hill et al. 1996, 2001; Sanderson et al. 2006),  
428 whereas others have found that honey bees adjust flower constancy according to the  
429 profitability of rewards (Greggers & Menzel 1993; Chittka et al. 1997; bumble bees: Heinrich  
430 1976, 1979b; reviewed in Grüter & Ratnieks 2011). Our simulations show that context-  
431 dependent flower constancy is more successful than strict (“spontaneous”) flower constancy  
432 (Fig. 6). When bees visiting the less profitable food type were only 90-95% flower constant,  
433 colonies collected about 25% more energy than colonies with strict flower constancy. As is the  
434 case with communication, context-dependent flower constancy allows bees to switch from the  
435 low-quality to the high-quality flower species over time (type *(ii)* costs).

436         Human impacts have significantly affected the diversity of plant species found in some  
437 environments, especially in intensively farmed habitats (e.g. Potts et al., 2010; Tew et al., 2021),  
438 which is likely to affect the costs and benefits of flower constancy. In our simulations, flower  
439 constancy performed considerably worse when there were four rather than two flower types  
440 (Fig. 7). With more plant species present, flower constant bees will ignore most of the available  
441 options and focus on a small subset of all food sources, thereby dramatically increasing  
442 opportunity costs (type *(i)* costs). Thus, bees should be less flower constant in more diverse  
443 foraging environments. Flower constant bees, in turn, might suffer a reduction in foraging

444 success in more biodiverse habitats. These findings challenge the reasoning behind the “costly  
445 information hypothesis”, which argues that flower constancy is an adaptive foraging strategy  
446 because acquiring information about suitable alternatives would cost too much time and energy  
447 if there are several plant species available (Chittka et al., 1999; Grüter & Ratnieks, 2011). In  
448 flower diverse environments, bees should accept even low-quality food source if it means they  
449 can cut time and energy costs imposed by flower constancy. Empirical studies on the links  
450 between floral diversity and flower constancy provide contrasting results. While Gervais et al.  
451 (2020) and Martínez-Bauer et al. (2021) found that increasing plant diversity was associated  
452 with lower flower constancy in *Bombus impatiens* and *B. terrestris*, Austin et al. (2019) found  
453 that bumble bees became more flower constant when there are more options available. The  
454 latter finding is more consistent with a “cognitive limitations” perspective, since deciding  
455 among more options would be cognitively more challenging and flower constancy, therefore, a  
456 possible solution to avoid switching costs (see also Chittka et al. 1997; Gegear & Thomson  
457 2004). Decision making is often impaired as the number of choices increases (Latty &  
458 Trueblood, 2020). The different studies differ in that the first two were performed under natural  
459 conditions, whereas Austin et al. (2019) was experimental. Non-experimental surveys can be  
460 confounded by numerous factors, such as differences in rewards, clustering of flowers or  
461 management, whereas experimental studies might fail to capture crucial features of natural  
462 environments that affect decision-making (Fawcett et al., 2014).

463 Agent-based models have important limitations. Simulation outcomes depend on the  
464 underlying assumptions and the parameters chosen when building the model, some of which  
465 are arbitrary or simplistic. As a result, ABMs potentially miss important natural features that  
466 shape decision-making (Fawcett et al., 2014). For example, we assumed that food sources are  
467 randomly distributed, whereas natural foraging environments are often spatially heterogenous  
468 and patchy, which is likely to affect the value of flower constancy. Patchiness can lead to flower  
469 constancy “by accident” if bees forage in large patches, even if they choose flowers

470 indiscriminately. We might, therefore, expect increasing patchiness to lead to more similar  
471 outcomes for flower constant and indiscriminate foragers. Pulliam's (1974) predator-prey  
472 model found that an increasingly clumped prey distribution favours a more specialised diet in  
473 predators and we might expect a similar finding in plant pollinator interactions. Agent-based  
474 models also have important strengths because they allow us to systematically vary factors that  
475 cannot be manipulated experimentally, such as tuning flower constancy or recruitment  
476 communication while keeping all other factors constant. ABMs should be seen as a useful tool  
477 to complement empirical studies.

478         One of the aims of our model was to test whether flower constancy could be an adaptive  
479 strategy *per se* under some foraging conditions, *i.e.* in the absence of cognitive constraints. If,  
480 however, switching between flower species leads to increased time costs or reduced reward  
481 sizes (Chittka et al., 1999; Darwin, 1876; Grüter & Ratnieks, 2011; Lewis, 1986; Raine &  
482 Chittka, 2007), flower constancy, with or without communication, becomes a much more  
483 beneficial strategy under a wide range of conditions (Fig. 8c,f). The reasons for flower  
484 constancy in pollinators are likely to be complex and depend on both constraints and adaptive  
485 processes, to varying degrees in different species. However, our results suggest that a more  
486 pronounced flower constancy in social bees is more likely due to increased performance of  
487 flower constancy in social species due to social traits, rather than the result of poorer cognitive  
488 abilities in social bees compared to solitary bees (Amaya-Márquez & Wells, 2008; Dukas &  
489 Real, 1991).

490

## 491 **Acknowledgements**

492 We thank the University of Bristol Ecology group for comments and feedback on the results of  
493 this study.

494

495



496 **References**

- 497 Aguilar, I., Fonseca, A., & Biesmeijer, J. C. (2005). Recruitment and communication of food source  
498 location in three species of stingless bees (Hymenoptera, Apidae, Meliponini). *Apidologie*, *36*,  
499 313–324.
- 500 Amaya-Márquez, M., & Wells, H. (2008). Social complexity and learning foraging tasks in bees.  
501 *Caldasia*, *30*(2), 469–477.
- 502 Ashman, T.-L., & Arceo-Gómez, G. (2013). Toward a predictive understanding of the fitness costs of  
503 heterospecific pollen receipt and its importance in co-flowering communities. *American*  
504 *Journal of Botany*, *100*(6), 1061–1070.
- 505 Austin, M. W., Horack, P., & Dunlap, A. S. (2019). Choice in a floral marketplace: The role of  
506 complexity in bumble bee decision-making. *Behavioral Ecology*, *30*(2), 500–508.
- 507 Bateman, A. J. (1951). The taxonomic discrimination of bees. *Heredity*, *5*(2), 271–278.
- 508 Bawa, K. S. (1990). Plant-pollinator interactions in Tropical rain forests. *Annual Review of Ecology*  
509 *and Systematics*, *21*, 399–422.
- 510 Campbell, D. R., & Motten, A. F. (1985). The Mechanism of Competition for Pollination between  
511 Two Forest Herbs. *Ecology*, *66*(2), 554–563.
- 512 Chittka, L., Gumbert, A., & Kunze, J. (1997). Foraging dynamics of bumble bees: Correlates of  
513 movements within and between plant species. *Behavioral Ecology*, *8*, 239–249.
- 514 Chittka, L., Thomson, J. D., & Waser, N. M. (1999). Flower constancy, insect psychology, and plant  
515 evolution. *Naturwissenschaften*, *86*, 361–377.
- 516 Cholis, M. N., Alpionita, R., Prawasti, T. S., & Atmowidi, T. (2020). *Pollen Load and Flower*  
517 *Constancy of Stingless Bees *Tetragonula laeviceps* (Smith) and *Heterotrigona itama**  
518 *(Cockerell) (Apidae: Meliponinae)*. *8*, 285–289.
- 519 Darwin, C. (1876). *Cross and self fertilization in the vegetable kingdom*. Murray.
- 520 Dornhaus, A., & Chittka, L. (1999). Evolutionary origins of bee dances. *Nature*, *401*(6748), 38–38.
- 521 Dornhaus, A., & Chittka, L. (2004). Information flow and regulation of foraging activity in bumble  
522 bees (*Bombus* spp.). *Apidologie*, *35*(2), 183–192.



- 523 Dukas, R., & Real, L. A. (1991). Learning foraging tasks by bees: A comparison between social and  
524 solitary species. *Animal Behaviour*, 42(2), 269–276.
- 525 Eckhardt, M., Haider, M., Dorn, S., & Müller, A. (2014). Pollen mixing in pollen generalist solitary  
526 bees: A possible strategy to complement or mitigate unfavourable pollen properties? *Journal*  
527 *of Animal Ecology*, 83(3), 588–597.
- 528 Farina, W. M. (2000). The interplay between dancing and trophallactic behavior in the honey bee *Apis*  
529 *mellifera*. *Journal of Comparative Physiology A-Neuroethology Sensory Neural and*  
530 *Behavioral Physiology*, 186(3), 239–245.
- 531 Farina, W. M., & Grüter, C. (2009). Trophallaxis—A mechanism of information transfer. In S. Jarau  
532 & M. Hrncir (Eds.), *Food exploitation by social insects: Ecological, behavioral, and*  
533 *theoretical approaches* (pp. 173–187). CRC Press.
- 534 Farina, W. M., Grüter, C., & Arenas, A. (2012). Olfactory information transfer during recruitment in  
535 honey bees. In C. G. Galizia, D. Eisenhardt, & M. Giurfa (Eds.), *Honeybee Neurobiology and*  
536 *Behavior—A Tribute to Randolph Menzel* (pp. 89–101). Springer.
- 537 Farina, W. M., Grüter, C., & Diaz, P. C. (2005). Social learning of floral odours within the honeybee  
538 hive. *Proceedings of the Royal Society of London Series B-Biological Sciences*, 272, 1923–  
539 1928.
- 540 Fawcett, T. W., Fallenstein, B., Higginson, A. D., Houston, A. I., Mallpress, D. E. W., Trimmer, P. C.,  
541 & McNamara, J. M. (2014). The evolution of decision rules in complex environments. *Trends*  
542 *in Cognitive Sciences*, 18(3), 153–161.
- 543 Free, J. B. (1963). The flower constancy of honeybees. *Journal of Animal Ecology*, 32, 119–131.
- 544 Gegear, R. J., & Thomson, J. D. (2004). Does the Flower Constancy of Bumble Bees Reflect Foraging  
545 Economics? *Ethology*, 110(10), 793–805.
- 546 Gervais, A., Courtois, È., Fournier, V., & Bélisle, M. (2020). Landscape composition and local floral  
547 resources influence foraging behavior but not the size of *Bombus impatiens* Cresson  
548 (Hymenoptera: Apidae) workers. *PLOS ONE*, 15(6), e0234498.
- 549 Goulson, D., Stout, J., & Hawson, S. A. (1997). Can flower constancy in nectar butterflies be  
550 explained by Darwin's interference hypothesis? *Oecologia*, 112, 225–231.

- 551 Goulson, D., & Wright, N. P. (1998). Flower constancy in the hoverflies *Episyrphus balteatus* (Degeer)  
552 and *Syrphus ribesii* (L.) (Syrphidae). *Behavioral Ecology*, 9, 213–219.
- 553 Grab, H., Brokaw, J., Anderson, E., Gedlinske, L., Gibbs, J., Wilson, J., Loeb, G., Isaacs, R., &  
554 Poveda, K. (2019). Habitat enhancements rescue bee body size from the negative effects of  
555 landscape simplification. *Journal of Applied Ecology*, 56, 2144–2154.
- 556 Grant, V. (1950). The flower constancy of bees. *The Botanical Review*, 16, 379–398.
- 557 Greggers, U., & Menzel, R. (1993). Memory dynamics and foraging strategies of honeybees.  
558 *Behavioral Ecology and Sociobiology*, 32(1), 17–29.
- 559 Grüter, C. (2020). *Stingless Bees: Their Behaviour, Ecology and Evolution*. Springer International  
560 Publishing.
- 561 Grüter, C., Leadbeater, E., & Ratnieks, F. L. W. (2010). Social learning: The importance of copying  
562 others. *Current Biology*, 20, R683–R685.
- 563 Grüter, C., Moore, H., Firmin, N., Helanterä, H., & Ratnieks, F. L. W. (2011). Flower constancy in  
564 honey bee foragers (*Apis mellifera*) depends on ecologically realistic rewards. *Journal of*  
565 *Experimental Biology*, 214, 1397–1402.
- 566 Grüter, C., & Ratnieks, F. L. W. (2011). Flower constancy in insect pollinators: Adaptive foraging  
567 behaviour or cognitive limitation? *Communicative and Integrative Biology*, 4, 633–636.
- 568 Hart, A. G., & Ratnieks, F. L. W. (2002). Task-partitioned nectar transfer in stingless bees: Work  
569 organisation in a phylogenetic context. *Ecological Entomology*, 27, 163–168.
- 570 Heinrich, B. (1975). Energetics of pollination. *Annual Review of Ecology and Systematics*, 6, 139–170.
- 571 Heinrich, B. (1976). The Foraging Specializations of Individual Bumblebees. *Ecological Monographs*,  
572 46(2), 105–128.
- 573 Heinrich, B. (1979). “Majoring” and “Minoring” by Foraging Bumblebees, *Bombus Vagans*: An  
574 Experimental Analysis. *Ecology*, 60(2), 246–255.
- 575 Hill, P. S. M., Wells, P. H., & Wells, H. (1997). Spontaneous flower constancy and learning in honey  
576 bees as a function of colour. *Animal Behaviour*, 54, 615–627.

- 577 Hrnčir, M. (2009). Mobilizing the Foraging Force Mechanical Signals in Stingless Bee Recruitment.  
578 In S. Jarau & M. Hrnčir (Eds.), *Food Exploitation by Social Insects: Ecological, Behavioral,*  
579 *and Theoretical Approaches* (Vol. 11). CRC Press, Taylor & Francis Group.
- 580 Hrnčir, M., Schmidt, V. M., Schorkopf, D. L. P., Jarau, S., Zucchi, R., & Barth, F. G. (2006).  
581 Vibrating the food receivers: A direct way of signal transmission in stingless bees (*Melipona*  
582 *seminigra*). *Journal of Comparative Physiology A*, 192(8), 879–887.
- 583 I'Anson Price, R. (2018). *The adaptive significance of communication and learning in bees* [PhD  
584 Thesis]. University of Lausanne, Switzerland.
- 585 I'Anson Price, R., Dulex, N., Vial, N., Vincent, C., & Grüter, C. (2019). Honeybees forage more  
586 successfully without the “dance language” in challenging environments. *Science Advances*, 5,  
587 eaat0450.
- 588 Ishii, H. S., & Masuda, H. (2014). Effect of flower visual angle on flower constancy: A test of the  
589 search image hypothesis. *Behavioral Ecology*, 25, 933–944.
- 590 Jakobsson, A., Padrón, B., & Traveset, A. (2008). Pollen transfer from invasive *Carpobrotus* spp. To  
591 natives – A study of pollinator behaviour and reproduction success. *Biological Conservation*,  
592 141(1), 136–145.
- 593 Jarau, S. (2009). Chemical Communication during Food Exploitation in Stingless Bees. In S. Jarau &  
594 M. Hrnčir (Eds.), *Food Exploitation by Social Insects: Ecological, Behavioral, and*  
595 *Theoretical Approaches* (Vol. 12). CRC University Press.
- 596 Jarau, S., & Hrnčir, M. (2009). *Food Exploitation by Social Insects: Ecological, Behavioral, and*  
597 *Theoretical Approaches* (S. Jarau & M. Hrnčir, Eds.). CRC Press, Taylor & Francis Group.
- 598 King, A. J., & Marshall, H. H. (2022). Optimal foraging. *Current Biology*, 32(12), R680–R683.
- 599 Klein, A.-M., Vaissiere, B. E., Cane, J. H., Steffan-Dewenter, I., Cunningham, S. A., Kremen, C., &  
600 Tschamtko, T. (2007). Importance of pollinators in changing landscapes for world crops.  
601 *Proceedings of the Royal Society B: Biological Sciences*, 274(1608), 303–313.
- 602 Kohl, P. L., Thulasi, N., Rutschmann, B., George, E. A., Steffan-Dewenter, I., & Brockmann, A.  
603 (2020). Adaptive evolution of honeybee dance dialects. *Proceedings of the Royal Society B:*  
604 *Biological Sciences*, 287(1922), 20200190.

- 605 Kozuharova, E. (2018). Flower Constancy of Bumblebees – The Case of (Fabaceae) Pollinators.  
606 *Journal of Apicultural Science*, 62(1), 135–140.
- 607 Krausa, K., Hager, F. A., & Kirchner, W. H. (2017). The effect of food profitability on foraging  
608 behaviors and vibrational signals in the African stingless bee *Plebeina hildebrandti*. *Insectes*  
609 *Sociaux*, 64(4), 567–578.
- 610 Kunin, W. E. (1993). Sex and the single mustard: Population density and pollinator behavior effects  
611 on seed-set. *Ecology*, 74, 2145–2160.
- 612 Latty, T., & Trueblood, J. S. (2020). How do insects choose flowers? A review of multi-attribute  
613 flower choice and decoy effects in flower-visiting insects. *Journal of Animal Ecology*, 89(n/a),  
614 2750–2762.
- 615 Lewis, A. C. (1986). Memory Constraints and Flower Choice in *Pieris rapae*. *Science*.
- 616 Lindauer, M., & Kerr, W. E. (1960). Communication between the workers of stingless bees. *Bee*  
617 *World*, 41, 29–71.
- 618 Marden, J. H., & Waddington, K. D. (1981). Floral choices by honey bees in relation to the relative  
619 distances to flowers. *Physiological Entomology*, 6, 431–435.
- 620 Martínez-Bauer, A. E., Chadwick, F. J., Westmoreland, A. J., & Lander, T. A. (2021). Novel pollen  
621 analogue technique shows bumblebees display low floral constancy and prefer sites with high  
622 floral diversity. *Landscape Ecology*.
- 623 Menzel, R. (1999). Memory dynamics in the honeybee. *Journal of Comparative Physiology A-*  
624 *Neuroethology Sensory Neural and Behavioral Physiology*, 185(4), 323–340.
- 625 Morales, C. L., & Traveset, A. (2008). Interspecific Pollen Transfer: Magnitude, Prevalence and  
626 Consequences for Plant Fitness. *Critical Reviews in Plant Sciences*, 27(4), 221–238.
- 627 Nieh, J. C. (2004). Recruitment communication in stingless bees (Hymenoptera, Apidae, Meliponini).  
628 *Apidologie*, 35(2), 159–182.
- 629 Núñez, J. A. (1966). Quantitative Beziehungen zwischen den Eigenschaften von Futterquellen und  
630 dem Verhalten von Sammelbienen. *Zeitschrift Für Vergleichende Physiologie*, 53, 142–164.
- 631 Núñez, J. A. (1970). The relationship between sugar flow and foraging and recruiting behaviour of  
632 honey bees (*Apis mellifera* L.). *Animal Behaviour*, 18, 527–538.

- 633 Ollerton, J., Winfree, R., & Tarrant, S. (2011). How many flowering plants are pollinated by animals?  
634 *Oikos*, 120(3), 321–326.
- 635 Pangestika, N. W., Atmowidi, T., & Kahono, S. (2017). Pollen Load and Flower Constancy of Three  
636 Species of Stingless Bees (Hymenoptera, Apidae, Meliponinae). *Tropical Life Sciences*  
637 *Research*, 28(2), 179–187.
- 638 Pohl, N. B., Wyk, J. V., & Campbell, D. R. (2011). Butterflies show flower colour preferences but not  
639 constancy in foraging at four plant species. *Ecological Entomology*, 36(3), 290–300.
- 640 Potts, S. G., Biesmeijer, J. C., Kremen, C., Neumann, P., Schweiger, O., & Kunin, W. E. (2010).  
641 Global pollinator declines: Trends, impacts and drivers. *Trends in Ecology & Evolution*, 25(6),  
642 345–353.
- 643 Pulliam, H. R. (1974). On the Theory of Optimal Diets. *The American Naturalist*, 108(959), 59–74.
- 644 Raine, N. E., & Chittka, L. (2007). Pollen foraging: Learning a complex motor skill by bumblebees  
645 (*Bombus terrestris*). *Naturwissenschaften*, 94, 459–464.
- 646 Rendell, L., Boyd, R., Cownden, D., Enquist, M., Eriksson, K., Feldman, W. M., Fogarty, L.,  
647 Ghirlanda, S., Lillicrap, T., & Laland, K. N. (2010). Why copy others? Insights from the social  
648 learning strategies tournament. *Science*, 328, 208–213.
- 649 Reynolds, A. M. (2009). Lévy flight patterns are predicted to be an emergent property of a  
650 bumblebees' foraging strategy. *Behavioral Ecology and Sociobiology*, 64(1), 19.
- 651 Reynolds, A. M., Smith, A. D., Reynolds, D. R., Carreck, N. L., & Osborne, J. L. (2007). Honeybees  
652 perform optimal scale-free searching flights when attempting to locate a food source. *Journal*  
653 *of Experimental Biology*, 210(21), 3763–3770.
- 654 Rossi, N., Santos, E., Salvarrey, S., Arbulo, N., & Invernizzi, C. (2015). Determination of Flower  
655 Constancy in *Bombus atratus* Franklin and *Bombus bellicosus* Smith (Hymenoptera: Apidae)  
656 through Palynological Analysis of Nectar and Corbicular Pollen Loads. *Neotropical*  
657 *Entomology*, 44(6), 546–552.
- 658 Seeley, T. D. (1986). Social foraging by honeybees—How colonies allocate foragers among patches  
659 of flowers. *Behavioral Ecology and Sociobiology*, 19(5), 343–354.

- 660 Slaa, E. J., Tack, A. J. M., & Sommeijer, M. J. (2003). The effect of intrinsic and extrinsic factors on  
661 flower constancy in stingless bees. *Apidologie*, *34*, 457–468.
- 662 Smith, C., Weinman, L., Gibbs, J., & Winfree, R. (2019). Specialist foragers in forest bee  
663 communities are small, social or emerge early. *Journal of Animal Ecology*, *88*(8), 1158–1167.
- 664 Song, Z., & Feldman, M. W. (2014). Adaptive foraging behaviour of individual pollinators and the  
665 coexistence of co-flowering plants. *Proceedings of the Royal Society B: Biological Sciences*,  
666 *281*(1776), 20132437.
- 667 Spaethe, J., Brockmann, A., Halbig, C., & Tautz, J. (2007). Size determines antennal sensitivity and  
668 behavioral threshold to odors in bumblebee workers. *Naturwissenschaften*, *94*, 733–739.
- 669 Stout, J. C., & Goulson, D. (2002). The Influence of Nectar Secretion Rates on the Responses of  
670 Bumblebees (*Bombus* spp.) to Previously Visited Flowers. *Behavioral Ecology and*  
671 *Sociobiology*, *52*(3), 239–246.
- 672 Tew, N. E., Memmott, J., Vaughan, I. P., Bird, S., Stone, G. N., Potts, S. G., & Baldock, K. C. R.  
673 (2021). Quantifying nectar production by flowering plants in urban and rural landscapes.  
674 *Journal of Ecology*, *109*, 1747–1757.
- 675 Van Nieuwstadt, M. G. L., & Iraheta, C. R. (1996). Relation between size and foraging range in  
676 stingless bees (Apidae, Meliponinae). *Apidologie*, *27*, 219–228.
- 677 von Frisch, K. (1967). *The dance language and orientation of bees*. Harvard University Press.
- 678 Walther-Hellwig, K., & Frankl, R. (2000). Foraging Distances of *Bombus muscorum*, *Bombus*  
679 *lapidarius*, and *Bombus terrestris* (Hymenoptera, Apidae). *Journal of Insect Behavior*, *13*(2),  
680 239–246.
- 681 Waser, N. M. (1986). Flower constancy: Definition, cause, and measurement. *American Naturalist*,  
682 *127*, 593–603.
- 683 Wells, H., & Rathore, R. R. S. (1994). Foraging ecology of the Asian hive bee, *Apis cerana indica*,  
684 within artificial flower patches. *Journal of Apicultural Research*, *33*, 219–230.
- 685 Wells, H., & Wells, P. H. (1983). Honey bee foraging ecology: Optimal diet, minimal uncertainty or  
686 individual constancy? *Journal of Animal Ecology*, *52*, 829–836.

687 Wells, H., & Wells, P. H. (1986). Optimal diet, minimal uncertainty and individual constancy in the  
688 foraging of honey bees, *Apis mellifera*. *Journal of Animal Ecology*, 55, 881-891.

689 Westphal, C., Steffan-Dewenter, I., & Tschardtke, T. (2006). Bumblebees experience landscapes at  
690 different spatial scales: Possible implications for coexistence. *Oecologia*, 149(2), 289–300.

691 White, D., Cribb, B. W., & Heard, T. A. (2001). Flower constancy of the stingless bee *Trigona*  
692 *carbonaria* Smith (Hymenoptera: Apidae: Meliponini). *Australian Journal of Entomology*,  
693 40(1), 61–64.

694 Wilensky, U. (1999). *NetLogo*. [Http://ccl.northwestern.edu/netlogo/](http://ccl.northwestern.edu/netlogo/). Northwestern University,  
695 Evanston, IL.

696 Williams, N. M., & Tepedino, V. J. (2003). Consistent mixing of near and distant resources in  
697 foraging bouts by the solitary mason bee *Osmia lignaria*. *Behavioral Ecology*, 14(1), 141–149.

698 Willmer, P. (2011). *Pollination and Floral Ecology*. Princeton University Press.

699

700

701

702

703

704

705

706

707

708

709

710

711

712

713

714 **Fig. S1**

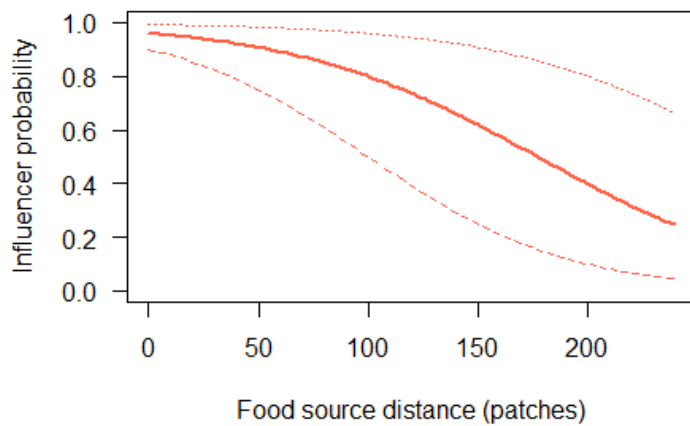

715

716 **Fig. S1.** Probability that a returning bee that visited the high-quality food type (red) becomes an  
717 influencer inside the nest. Bees visiting the low-quality food type did not become influencers under  
718 default conditions. Thick red line shows the default probability. The other two lines show other tested  
719 probability curves. 1 patch ~ 5 m.

720

721

722

723

724

725

726

727

728

729

730

731

732

733

734



735 **Fig. S2**

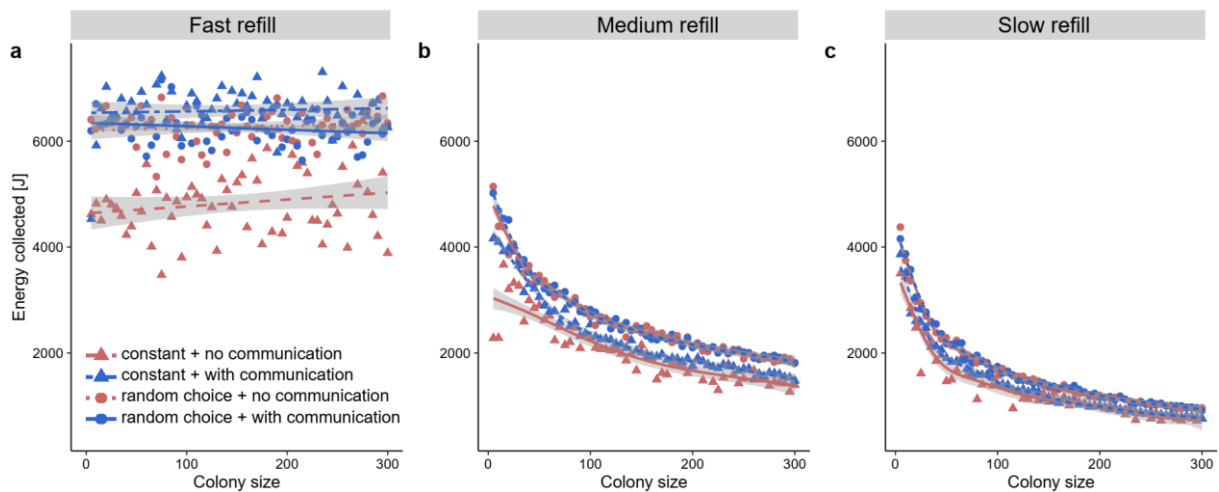

736

737 **Fig. S2.** Energy collected per bee for different colony sizes and different refill speeds (fast refill,  $t_{\text{refill}} = 0$ ;  
738 medium refill,  $t_{\text{refill}} = 1200$ ; slow refill,  $t_{\text{refill}} = 3600$ ). Lines in (a) show best fit lines based on linear  
739 regression. In (b) and (c), generalised additive models (GAM) were used to fit curves. Grey bands show  
740 95% confidence intervals. Default values were used for other parameters.

741

742

743

744

745

746

747

748

749

750

751

752

753

754

755 **Fig. S3**

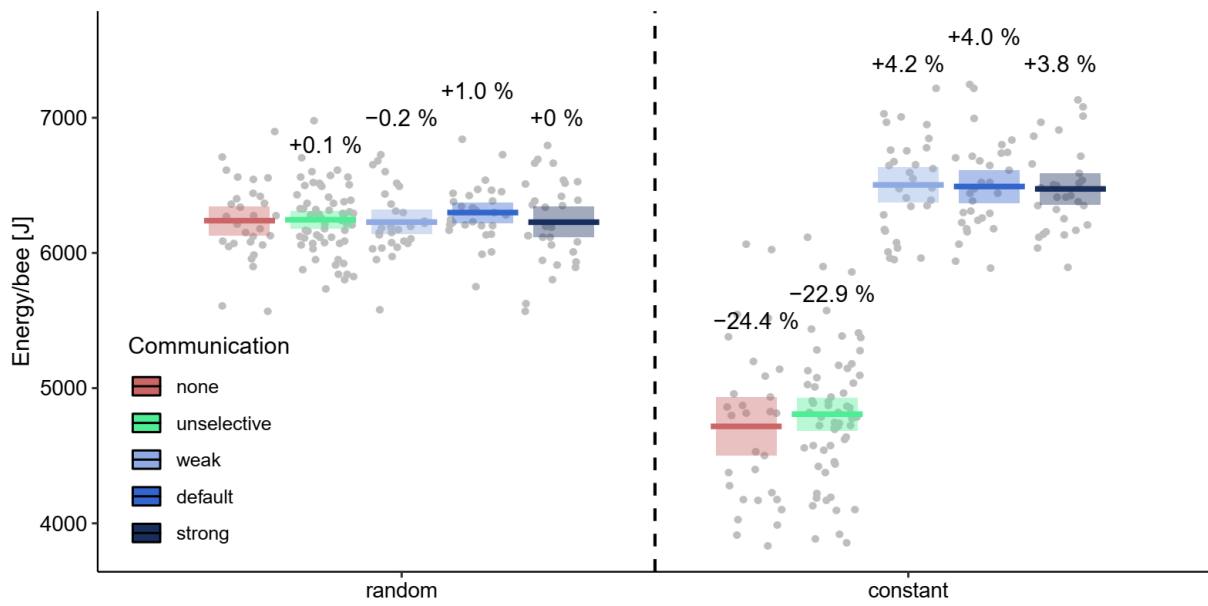

756

757 **Fig. S3.** Energy collected per bee for different types of communication, with or without flower constancy.  
758 The different recruitment strengths (weak, default and strong) correspond to the three different curves  
759 shown in S1. Unselective refers to a situation where bees communicate equally about high- and low-  
760 quality food sources (assuming the default curve shown in Fig. S1). Means and 95%-confidence  
761 intervals are shown.

762

763

764

765

766

767

768

769

770

771

772

773

774 **Fig. S4**

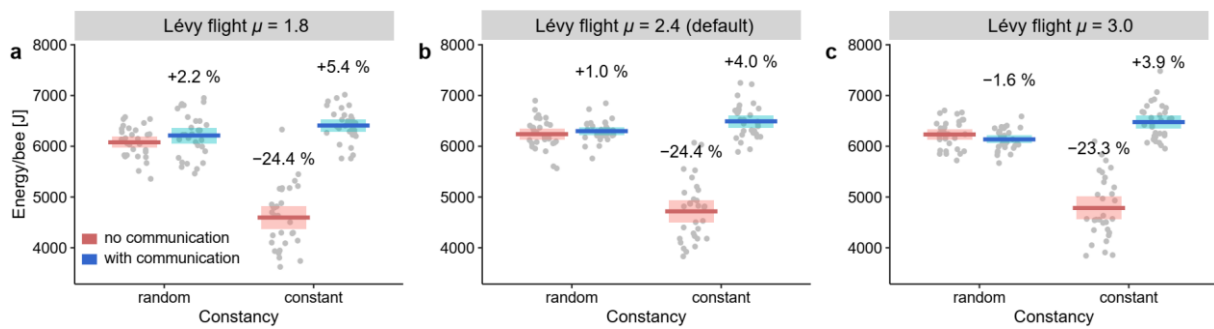

775

776 **Fig. S4.** Energy per bee (Joule) collected using different Lévy-flight  $\mu$  values, which determines the  
777 distribution of the segment lengths  $l$  that constitute a Lévy-flight, with  $P(l) \sim l^{-\mu}$ . Food sources that refill  
778 immediately were simulated. Default values were used for the other parameters (Table 1).

779

780

781

782

783

784

785

786

787

788

789

790

791

792

793

794

795

796

797

798

799

800 **Fig. S5**

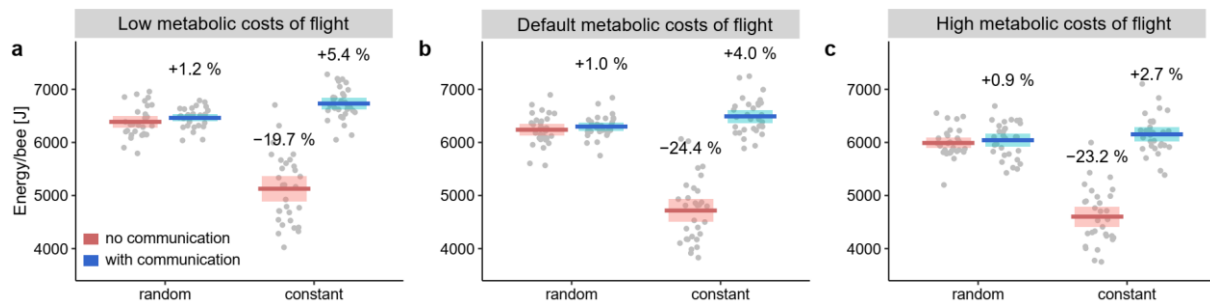

801

802 **Fig. S5.** Energy per bee (Joule) collected using different flight energy costs (low = 0.016 J/tick; default  
803 = 0.032 J/tick; high = 0.064 J/tick). Food sources refilled immediately. Default values were used for the  
804 other parameters (Table 1).

805

806

807

808

809

810

811

812

813

814

815

816

817

818

819

820

821

822

823

824 **Fig. S6**

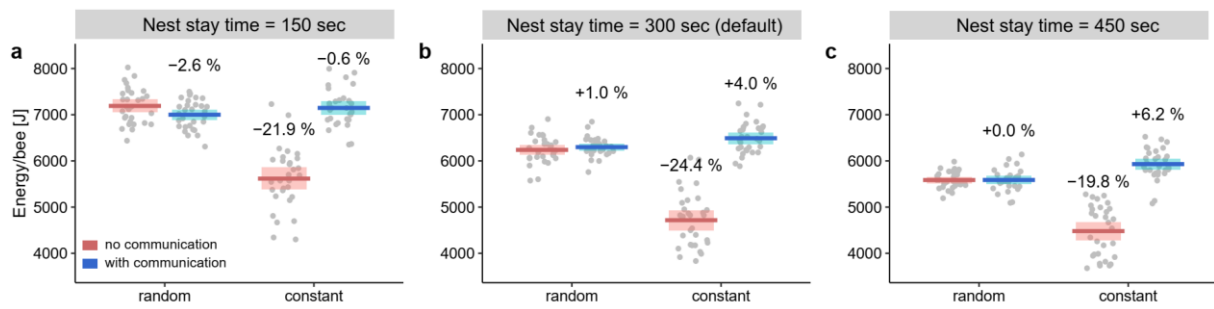

825

826 **Fig. S6.** Energy per bee (Joule) collected using different nest stay times. Food sources refilled  
827 immediately. Default values were used for the other parameters (Table 1).

828

829

830

831

832

833

834

835

836

837

838

839

840

841

842

843

844

845

846

847

848 **Fig. S7**

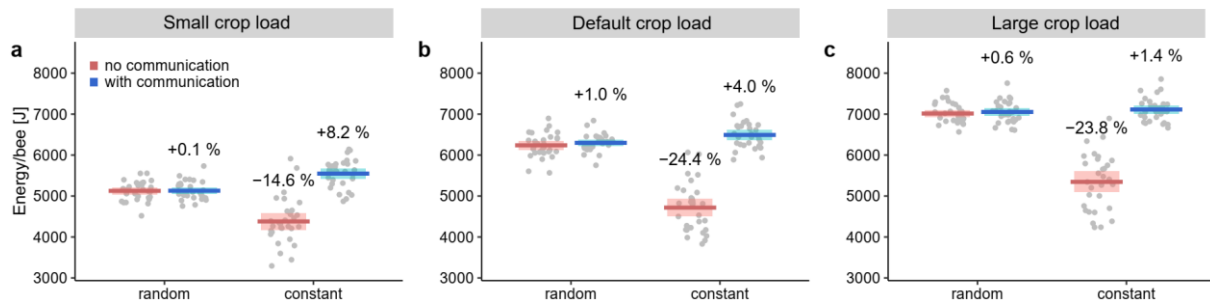

849

850 **Fig. S7.** Energy per bee (Joule) collected with different crop loads. (a) Small crop loads mean that bees  
851 constant to high-quality food sources filled their crop to 25 $\mu$ l, whereas bees constant to low-quality food  
852 sources returned to their nest if their crop load was 12.5 $\mu$ l. Bees choosing food sources randomly had  
853 intermediate crop loads (18.75 $\mu$ l). (c) Bees with large crop loads foraged until they had 100 $\mu$ l (constant  
854 to high-quality food sources), 50 $\mu$ l (constant to low-quality food sources or 75 $\mu$ l (randomly choosing  
855 bees). Food sources refilled immediately. Default values were used for the other parameters (Table 1).

856

857

858

859

860

861

862

863

864

865

866

867

868

869

870

871

872
